# Supplementary material for: NiO nanobelts with exposed {110} crystal planes as an efficient electrocatalyst for the oxygen evolution reaction
Source: Royal Society of Chemistry journal article supplement (doi:10.1039/d1cp05236e), 2022-01-01
Supplement: d1cp05236e1.pdf [file d1cp05236e1.pdf]

## Supplementary material

### **NiO nanobelts exposed with {110} crystal planes as an efficient electrocatalyst for oxygen evolution reaction**

Jiajun Wang,<sup>[a]</sup> Jiaying Xu,<sup>[a]</sup> Qian Wang,<sup>[a]</sup> Zhongyi Liu,<sup>[a]</sup> Xue zhang,<sup>[a]</sup> Jie Zhang,<sup>[a]</sup> Shulai Lei,<sup>[b]</sup> Yan Li,<sup>[a]</sup> Jianshuai Mu\*<sup>[a]</sup> and En-Cui Yang\*<sup>[a]</sup>

*<sup>a</sup>College of Chemistry, Tianjin Key Laboratory of Structure and Performance for Functional Molecules, Tianjin Normal University, Tianjin 300387, P. R. China.*

*<sup>b</sup>Hubei Key Laboratory of Low Dimensional Optoelectronic Materials and Devices, Hubei University of Arts and Science*

\*Corresponding author at: College of Chemistry, Tianjin Key Laboratory of Structure and Performance for Functional Molecules, Tianjin Normal University, Tianjin 300387, P. R. China

*E-mail address: [hxxymujianshuai@tjnu.edu.cn](mailto:hxxymujianshuai@tjnu.edu.cn) (J. Mu), [encui\\_yang@163.com](mailto:encui_yang@163.com) (E. Yang)*

### DFT Calculation For Oxygen Evolution Reaction (OER):

The atomic scale mechanisms of the OER are complicated and not fully established, insights into the thermodynamics of the reaction can be obtained using the scheme developed by Norskov et al [1]. In the scheme, the OER is assumed to involve four elementary reaction steps and each involves electron transfer of an electron to the electrode and a proton to water:

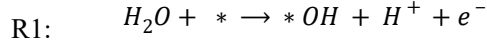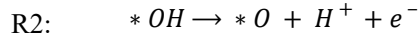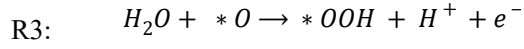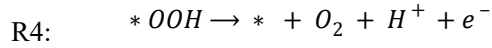

Where \* and \*X denotes an adsorption site and an adsorbed X species, respectively;  $H_2O$  is a water molecule in liquid phase. Therefore, the free energy of the OER is computed by the formula  $\Delta G = \Delta E + \Delta ZPE - T\Delta S$ , where the  $\Delta E$  can be obtained by the computation of geometrical structures. The value of  $\Delta ZPE$  and  $\Delta S$  were determined by computed vibrational frequencies and standard table for the reactants and products in the gas phase and the entropy of adsorbed atoms or molecules at surface active site were set as zero. Moreover, for the total reaction  $H_2O \rightarrow \frac{1}{2}O_2 + H_2$ , the free energy change was fixed at experiment value of 2.46 eV per water molecule. So the free energy change for reaction R1-R4 can be expressed as

$$\Delta G_{R1} = \Delta G_{OH} - Ue$$

$$\Delta G_{R2} = \Delta G_O - \Delta G_{OH} - Ue$$

$$\Delta G_{R3} = \Delta G_{OOH} - \Delta G_O - Ue$$

$$\Delta G_{R4} = 4.92 - \Delta G_{OOH} - Ue$$

Where U is the potential measured against normal hydrogen electrode at standard conditions.

The theoretical overpotential is defined as  $\eta = \max\{\Delta G_{R1}, \Delta G_{R2}, \Delta G_{R3}, \Delta G_{R4}\}/e - 1.23$  (V).

**Table S1.** Details of the reaction conditions for the synthesis of NiO nanobelts and nanoplates

| Morphology | Hydrothermal Reaction |                   |                                   | Calcination     |                 |
|------------|-----------------------|-------------------|-----------------------------------|-----------------|-----------------|
|            | NaOH                  | NiSO <sub>4</sub> | Ni(NO <sub>3</sub> ) <sub>2</sub> | Temperature/Tim | Temperature/Tim |
|            | (g)                   | (g)               | (g)                               | e<br>(°C/h)     | e<br>(°C/h)     |
| Nanobelts  | 0.1960                | 2.5759            | -                                 | 120°C/4h        | 500°C/4h        |
| Nanoplates | 0.3000                | -                 | 2.9080                            | 180°C/8h        | 300°C/2h        |

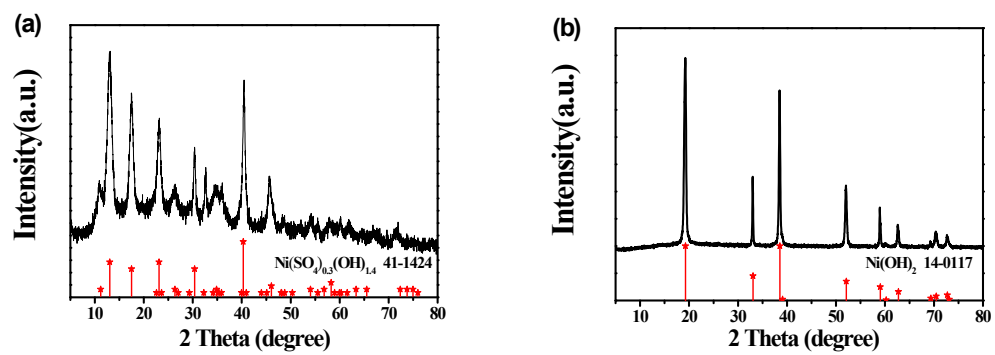

**Fig. S1** XRD patterns of (a) nanobelts precursors and (b) nanoplates precursors.

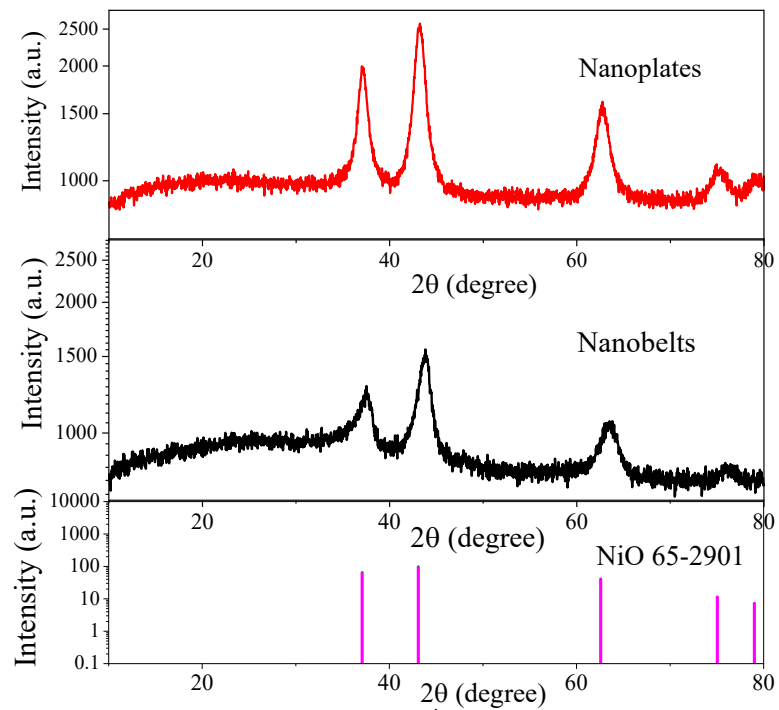

**Fig. S2** XRD patterns of NiO nanobelts and nanoplates (Intensity was presented in logarithmic plot).

**Table S2.** Particle size, structural, surface area, porosity, and electrochemical performance of NiO nanobelts and nanoplates

| Samples    | Average crystallite size (nm) | Sizes of nanostructures                      | BET Surface area (m <sup>2</sup> /g) | Total pore volume (mL/g) | Current density (mA/cm <sup>2</sup> ) at 400 mV overpotential | Tafel slope (mV/dec) | Specific capacitance (mF/cm <sup>2</sup> ) |
|------------|-------------------------------|----------------------------------------------|--------------------------------------|--------------------------|---------------------------------------------------------------|----------------------|--------------------------------------------|
| Nanobelts  | 5.4                           | Length: 60 nm,<br>Thickness: 20 nm           | 98.7                                 | 0.528                    | 66.3                                                          | 142.5                | 0.78                                       |
| Nanoplates | 5.5                           | Length: several micrometers,<br>Width: 16 nm | 153.0                                | 0.183                    | 15.4                                                          | 154.2                | 3.6                                        |

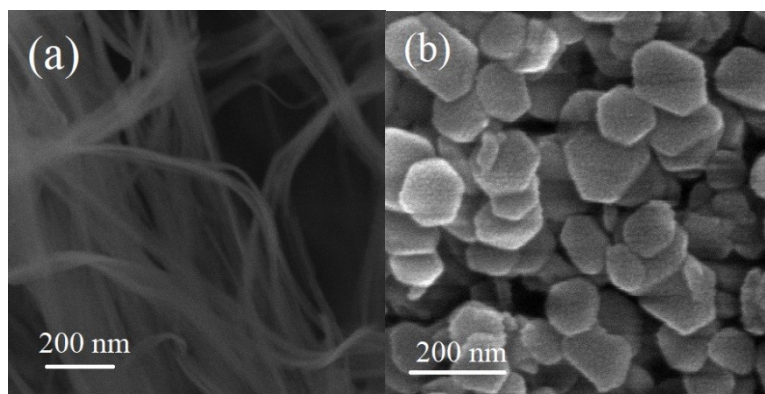

**Fig. S3** SEM images of (a) NiO nanobelts precursors and (b) NiO nanoplates precursors.

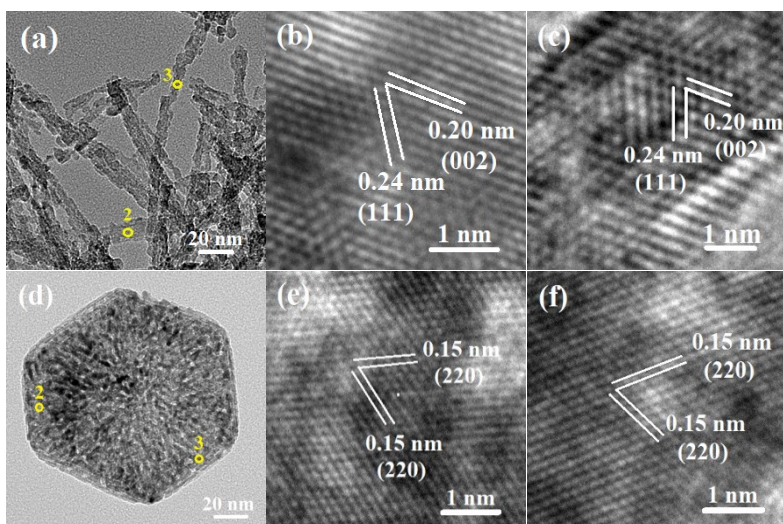

**Fig. S4** (a-c) TEM and HRTEM images of NiO nanobelts at spot 2 and 3, (d-f) TEM and HRTEM images of NiO nanoplates at spot 2 and 3,



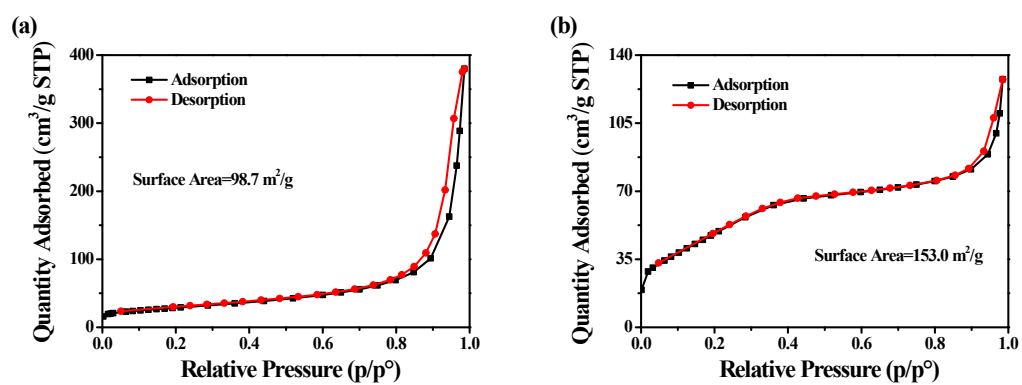

Fig. S5 Nitrogen adsorption/desorption curves of (a) NiO nanobelts and (b) NiO nanoplates.

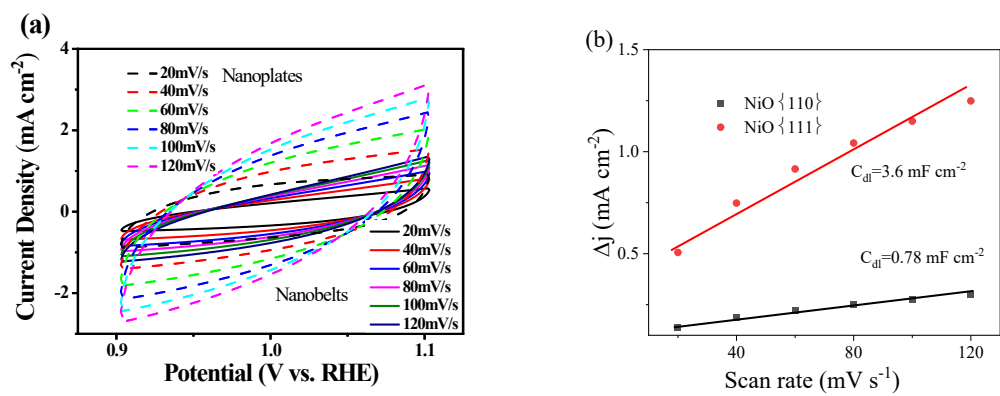

**Fig. S6** (a) CV curves of NiO nanobelts and nanoplates at different scan rates, (b) Plots of capacitive currents with respect to scan rate normalized by active mass.

**Table S3** OER performances comparison of reported representative Ni-based electrocatalysts

| Catalysts                                 | Current density<br>(mA cm <sup>-2</sup> ) | Overpotential<br>(mV) | Tafel slopes<br>(mV dec <sup>-1</sup> ) | References |
|-------------------------------------------|-------------------------------------------|-----------------------|-----------------------------------------|------------|
| NiO/CeO <sub>2</sub>                      | 50                                        | 330                   | 85                                      | [2]        |
| NW@CC                                     |                                           |                       |                                         |            |
| Mo-Ni/C                                   | 10                                        | 470                   | 93                                      | [3]        |
| Ni @ NiO/N-C                              | 10                                        | 390                   | 100                                     | [4]        |
| N doped NiO                               | 100                                       | 750                   | 136                                     | [5]        |
| NiCo <sub>2</sub> O <sub>4</sub> /NiO-rGO | 10                                        | 350                   | 66                                      | [6]        |
| Ni@NiO Nanowires                          | 10                                        | 382                   | 103                                     | [7]        |
| NiO@C                                     | 100                                       | 500                   | 92                                      | [8]        |
| NiO nanobelts                             | 50                                        | 382                   | 142.5                                   | This work  |
|                                           | 100                                       | 429                   |                                         |            |

References:

- [1] J.K. Norskov, J. Rossmeisl, A. Logadottir, L. Lindqvist, J.R. Kitchin, T. Bligaard, H. Jonsson, Origin of the overpotential for oxygen reduction at a fuel-cell cathode, *Journal of Physical Chemistry B*, 108 (2004) 17886-17892.
- [2] H.Y. Yang, G.L. Dai, Z.L. Chen, J. Wu, H. Huang, Y. Liu, M.W. Shao, Z.H. Kang, Pseudo-Periodically Coupling Ni-O Lattice with Ce-O Lattice in Ultrathin Heteronanowire Arrays for Efficient Water Oxidation, *Small*, 17 (2021) 2101727.
- [3] J. Bejar, L. Alvarez-Contreras, M. Guerra-Balcazar, J. Ledesma-Garcia, L.G. Arriaga, N. Arjona, Synthesis of a small-size metal oxide mixture based on MoO<sub>x</sub> and NiO with oxygen vacancies as bifunctional electrocatalyst for oxygen reactions, *Applied Surface Science*, 509 (2020) 144898.
- [4] A.J. Xie, J. Zhang, X. Tao, J.H. Zhang, B.Y. Wei, W.H. Peng, Y.W. Tao, S.P. Luo, Nickel-based MOF derived Ni @ NiO/N-C nanowires with core-shell structure for oxygen evolution reaction, *Electrochimica Acta*, 324 (2019) 134814.
- [5] B.R. Xia, T.T. Wang, X.D. Jiang, J. Li, T.M. Zhang, P. Xi, D.Q. Gao, D.S. Xue, N<sup>+</sup>-ion irradiation engineering towards the efficient oxygen evolution reaction on NiO nanosheet arrays, *Journal of Materials Chemistry A*, 7 (2019) 4729-4733.
- [6] Y. Wang, Z. Zhang, X. Liu, F. Ding, P. Zou, X. Wang, Q. Zhao, H. Rao, MOF-Derived NiO/NiCo<sub>2</sub>O<sub>4</sub> and NiO/NiCo<sub>2</sub>O<sub>4</sub>-rGO as Highly Efficient and Stable Electrocatalysts for Oxygen Evolution Reaction, *ACS Sustain. Chem. Eng.*, 6 (2018) 12511-12521.
- [7] H.H. Sun, Z. Ma, Y.F. Qiu, H. Liu, G.G. Gao, Ni@NiO Nanowires on Nickel Foam Prepared via "Acid Hungry" Strategy: High Supercapacitor Performance and Robust Electrocatalysts for Water Splitting Reaction, *Small*, 14 (2018) 1800294.
- [8] Q.C. Dong, C.C. Sun, Z.Y. Dai, X.X. Zang, X.C. Dong, Free-Standing NiO@C Nanobelt as an Efficient Catalyst for Water Splitting, *Chemcatchem*, 8 (2016) 3484-3489.
